# Supplementary material
Source: PubMed Central journal article supplement (PMC4409930)
Supplement: NIHMS674804-supplement-1.pdf [file NIHMS674804-supplement-1.pdf]

## Supplemental Figures

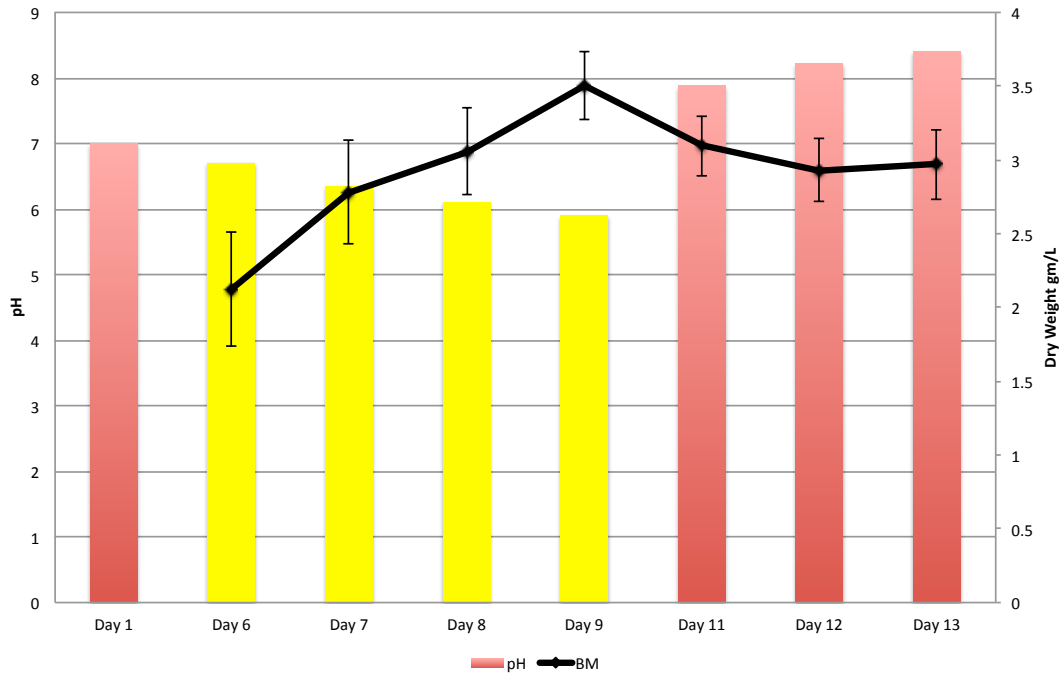

**Figure S1, Related to Figure 1.** Representative phenol red growth curve (*S. tropica* strain CNY-681). The culture pH dropped below 7 at day 6, which corresponded to a phenol red color change from red to yellow. Upon entering stationary phase after day 9, the pH increased to above 7, which resulted in a color change from yellow back to red. All cultures were extracted when this yellow to red color change was observed. Standard deviations around the mean were calculated for the dry weight biomasses (BM) from three independent cultures.

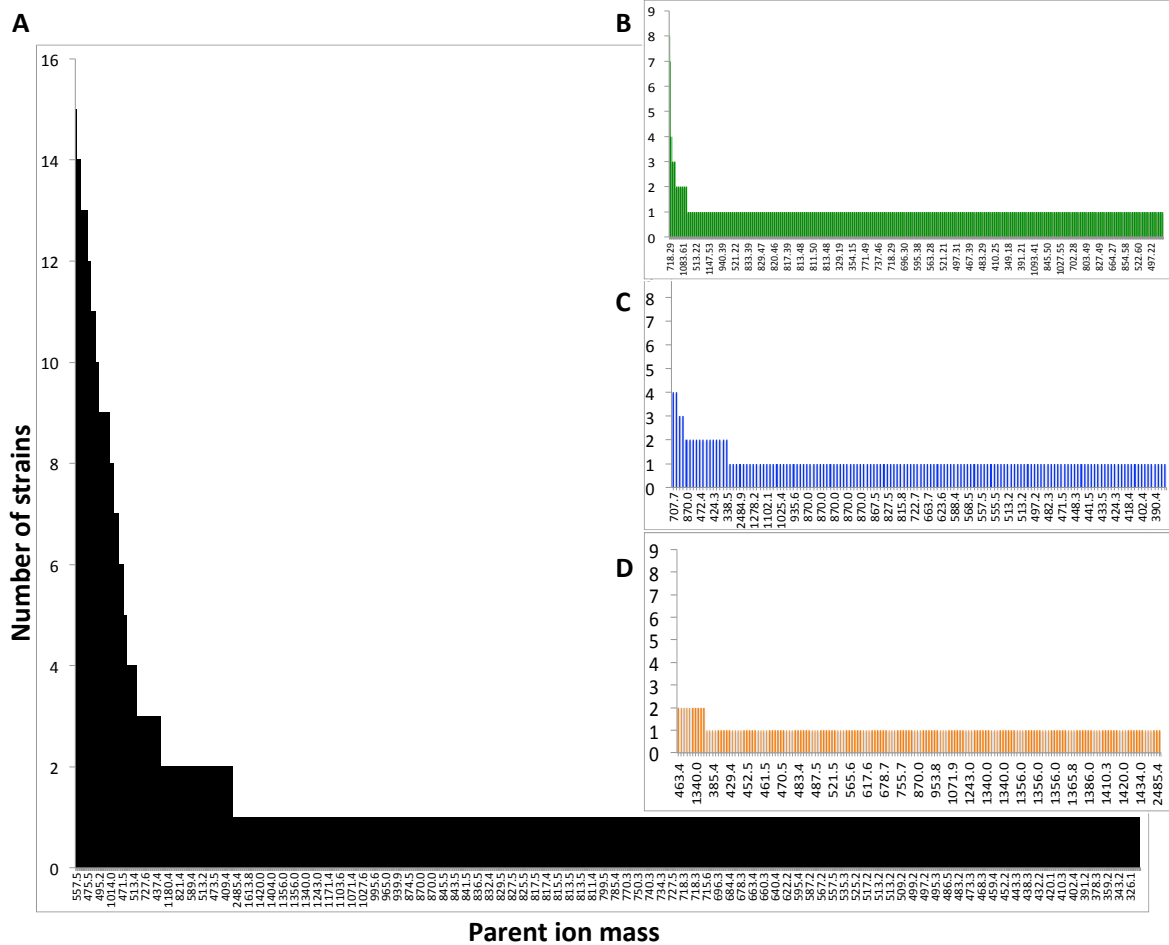

**Figure S2, Related to Figure 2.** Rank-abundance curve of parent ion distributions. A) Excluding media components, a total of 1114 parent ions were observed of which 85.3 % were detected in only one strain. B) *S. arenicola* parent ion distribution among 12 strains. C) *S. pacifica* parent ion distribution among 17 strains. D) *S. tropica* parent ion distribution among 7 strains. Note: Y-axis = number of strains for figures B-C; scales vary among figures.

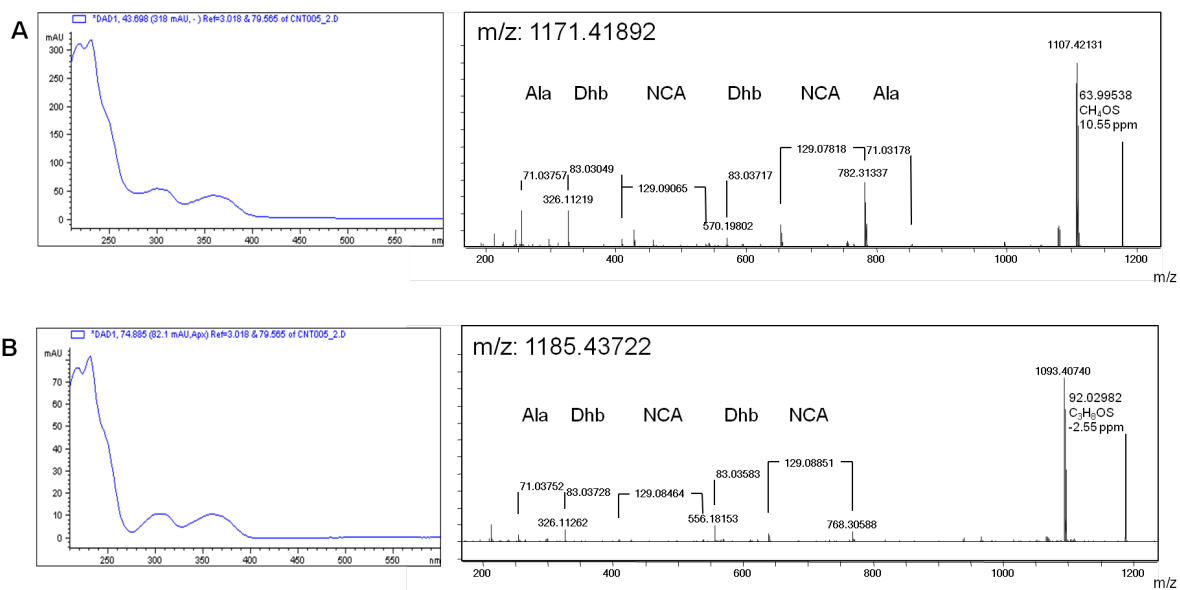

**Figure S3. Related to Figure 5.** : UV-Vis spectra and MS2 fragmentation patterns for (A) retimycin A and (B) the retimycin  $m/z$  1185 analogue.

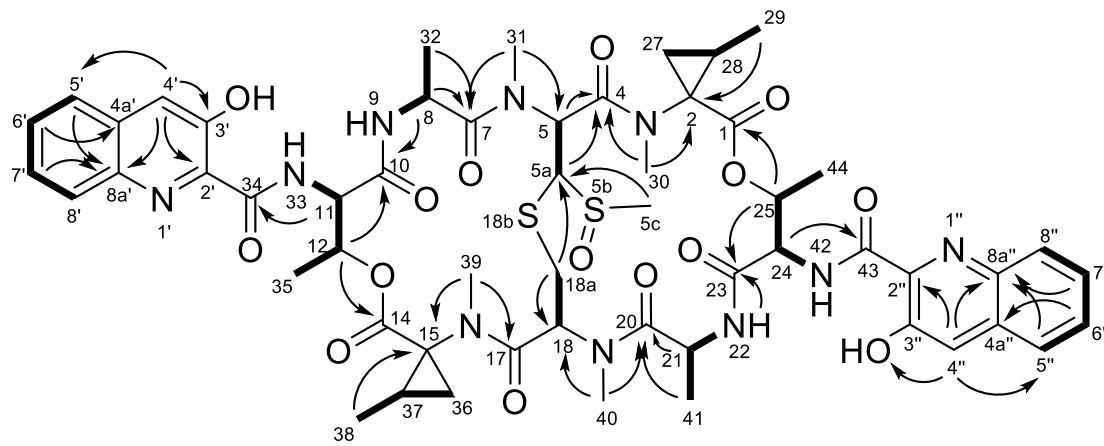

**Figure S4, Related to Figure 5.**  $^1\text{H}-^1\text{H}$  COSY (bold lines) and key HMBC (arrows) correlations of retimycin A

A)

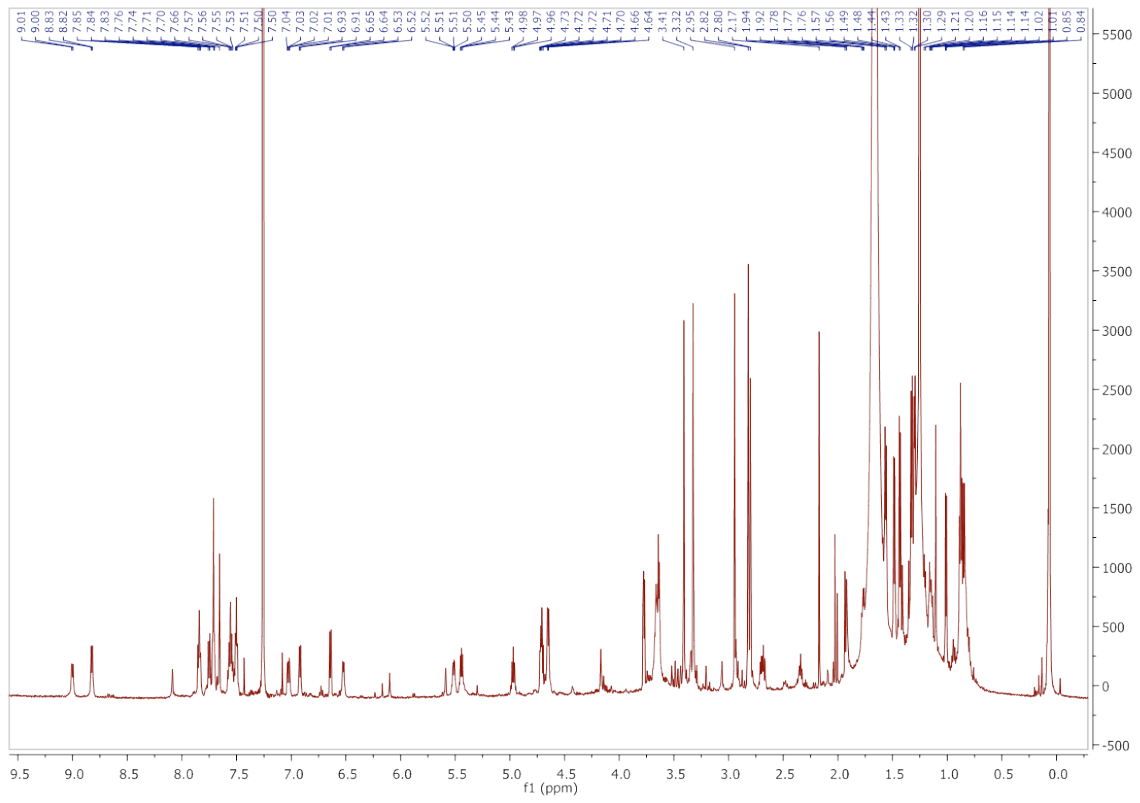

B)

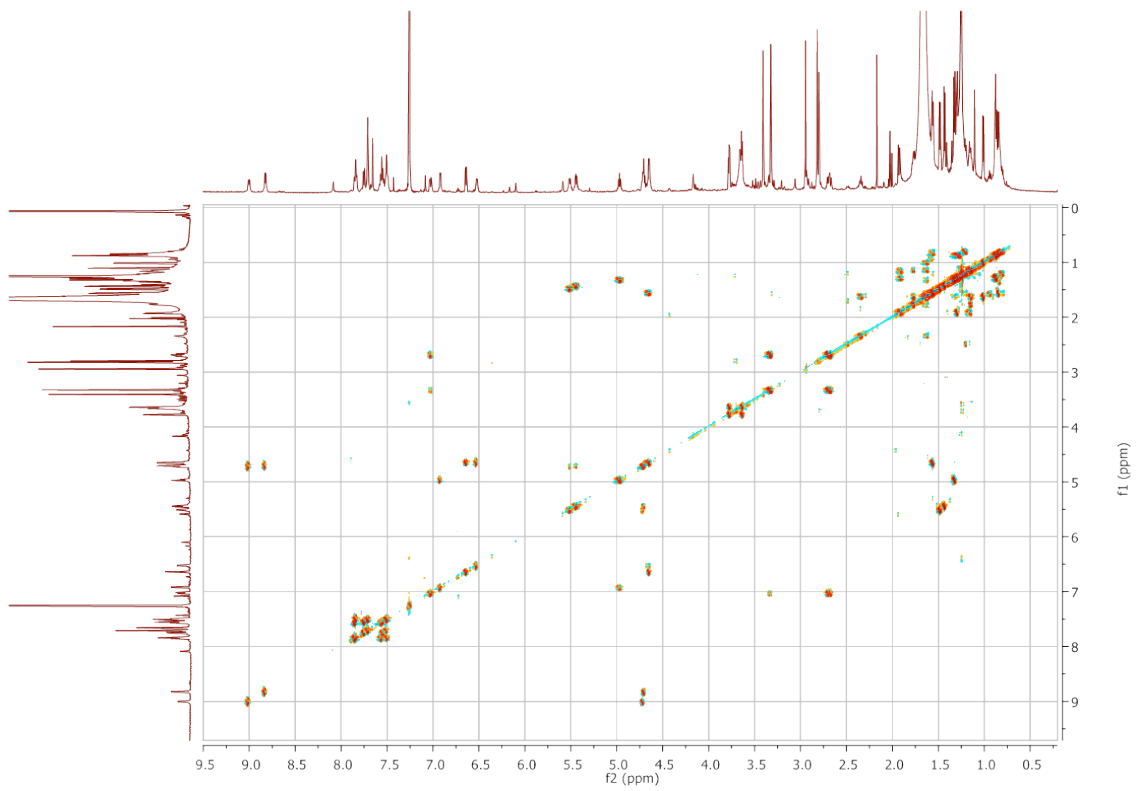

C)

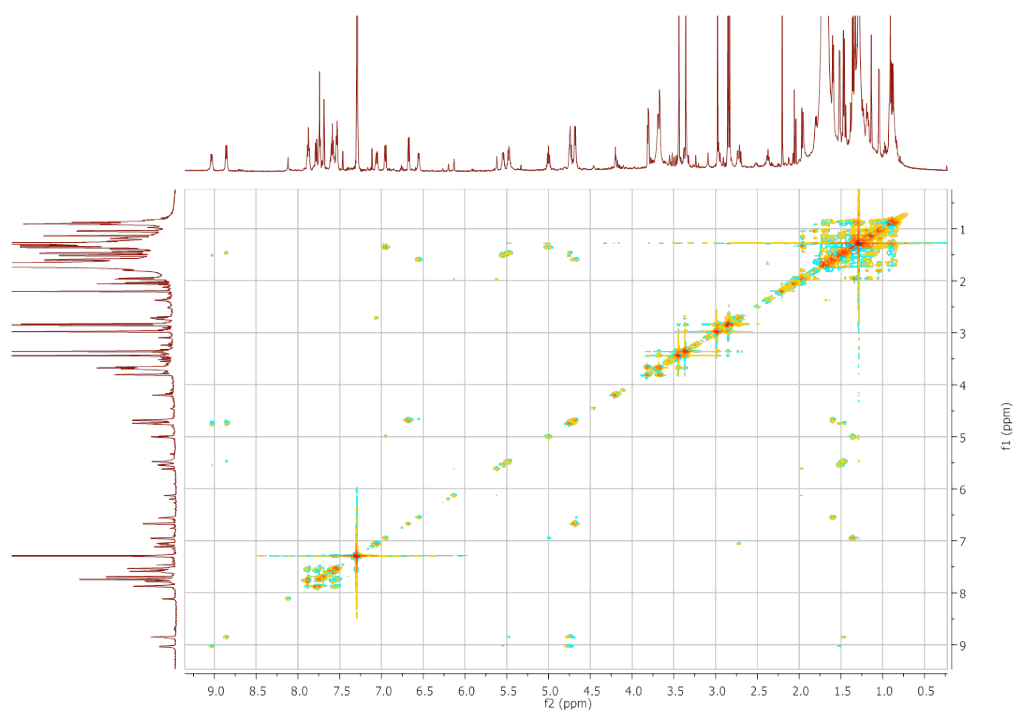

D)

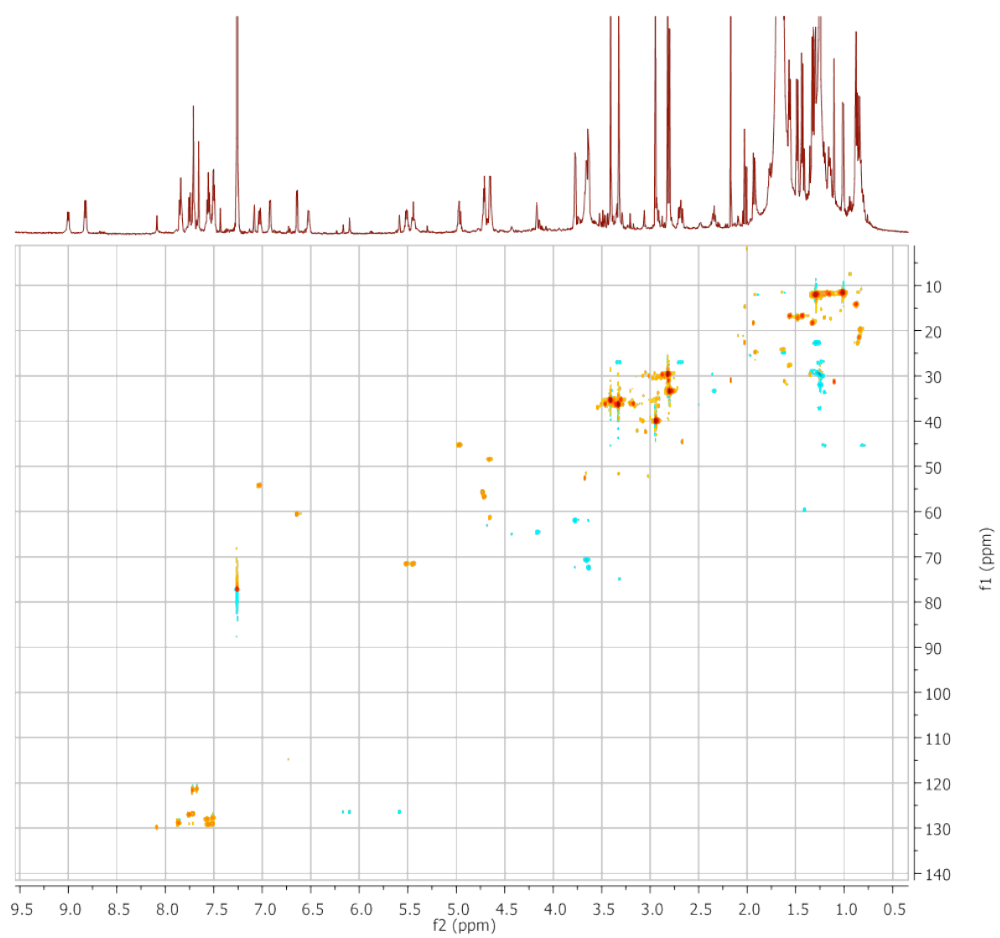

E)

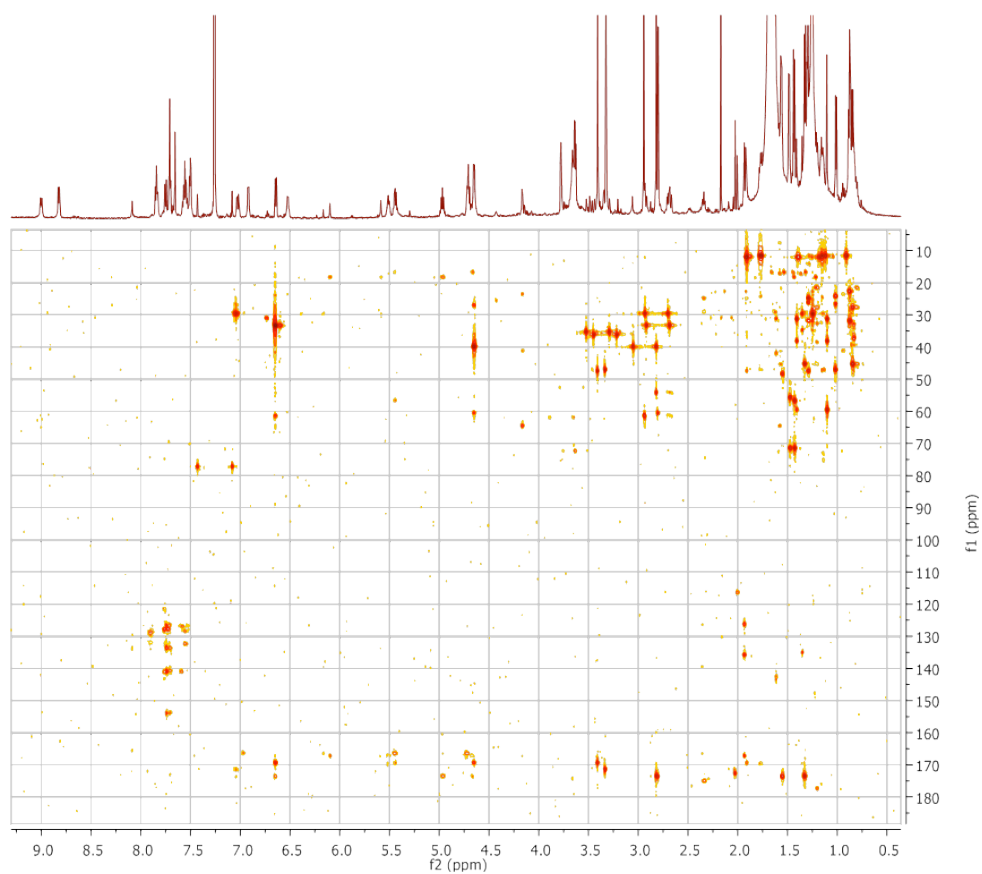

**Figure S5, Related to Figure 5.** A)  $^1\text{H}$  NMR spectrum of retemycin A ( $\text{CDCl}_3$ , 600 MHz). B) DQF-COSY spectrum of retemycin A ( $\text{CDCl}_3$ , 600 MHz). C) TOCSY spectrum of retemycin A ( $\text{CDCl}_3$ , 600 MHz). D) HSQC spectrum of retemycin A ( $\text{CDCl}_3$ , 600 MHz). E) HMBC spectrum of retemycin A ( $\text{CDCl}_3$ , 600 MHz).

## Supplemental Tables

**Table S1, Related to Table 1.** *Salinispora* strains used in this study. NA = not available, IMG = Integrated Microbial Genomes (<http://img.jgi.doe.gov/>).

| Number of strains | Species             | Strain  | Location          | 16S Sequence type <sup>a</sup><br>(accession number) | Extraction time<br>(days) | Genome sequence | New to this study | IMG Genome ID |
|-------------------|---------------------|---------|-------------------|------------------------------------------------------|---------------------------|-----------------|-------------------|---------------|
| 1                 | <i>S. arenicola</i> | CNB-527 | Bahamas           | ST (JN999716)                                        | 19                        | Yes             | No                | 2515154093    |
| 2                 | <i>S. arenicola</i> | CNH-646 | Bahamas           | ST (AY040620)                                        | 13                        | Yes             | No                | 2515154181    |
| 3                 | <i>S. arenicola</i> | CNH-725 | Red Sea           | ST (AY040621)                                        | 19                        | No              | NA                | NA            |
| 4                 | <i>S. arenicola</i> | CNH-996 | Sea of Cortez     | A (JN999727)                                         | 30                        | Yes             | Yes               | 2561511104    |
| 5                 | <i>S. arenicola</i> | CNP-188 | US Virgin Islands | ST (KM205629)                                        | 17                        | No              | NA                | NA            |
| 6                 | <i>S. arenicola</i> | CNP-193 | Sea of Cortez     | B (NA)                                               | 18                        | Yes             | No                | 2518285552    |
| 7                 | <i>S. arenicola</i> | CNQ-748 | Guam              | ST (NA)                                              | 18                        | Yes             | No                | 2515154180    |
| 8                 | <i>S. arenicola</i> | CNR-647 | Bahamas           | ST (FJ887039)                                        | 19                        | No              | NA                | NA            |
| 9                 | <i>S. arenicola</i> | CNS-205 | Palau             | ST (NR_074612)                                       | 11                        | Yes             | No                | 641228504     |
| 10                | <i>S. arenicola</i> | CNT-005 | Fiji              | ST (JN161827)                                        | 19                        | Yes             | No                | 2517572137    |
| 11                | <i>S. arenicola</i> | CNT-849 | Hawaii            | ST (NA)                                              | 15                        | Yes             | No                | 2518285550    |
| 12                | <i>S. arenicola</i> | CNX-508 | Palmyra           | ST (NA)                                              | 15                        | Yes             | No                | 2515154188    |
| 13                | <i>S. pacifica</i>  | CNR-894 | Palau             | ST (NA)                                              | 14                        | Yes             | No                | 2515154194    |
| 14                | <i>S. pacifica</i>  | CNR-114 | Guam              | ST (DQ224161)                                        | 13                        | Yes             | No                | 2515154178    |
| 15                | <i>S. pacifica</i>  | CNR-551 | Guam              | A (HQ642881)                                         | 13                        | No              | NA                | NA            |
| 16                | <i>S. pacifica</i>  | CNR-942 | Palau             | E (HQ642877)                                         | 11                        | Yes             | No                | 2518285561    |
| 17                | <i>S. pacifica</i>  | CNS-055 | Palau             | A (DQ224159)                                         | 13                        | Yes             | No                | 2518285562    |
| 18                | <i>S. pacifica</i>  | CNS-237 | Palau             | B (HQ642850)                                         | 13                        | Yes             | Yes               | 2524614807    |
| 19                | <i>S. pacifica</i>  | CNS-863 | Fiji              | C (HQ642851)                                         | 25                        | Yes             | No                | 2517572194    |
| 20                | <i>S. pacifica</i>  | CNT-003 | Fiji              | ST (NA)                                              | 30                        | Yes             | No                | 2515154126    |
| 21                | <i>S. pacifica</i>  | CNT-029 | Fiji              | F (HQ642852)                                         | 13                        | Yes             | No                | 2515154177    |
| 22                | <i>S. pacifica</i>  | CNT-138 | Fiji              | C (HQ642853)                                         | 16                        | Yes             | No                | 2516493032    |
| 23                | <i>S. pacifica</i>  | CNT148  | Fiji              | A (HQ642899)                                         | 29                        | Yes             | No                | 2517287023    |
| 24                | <i>S. pacifica</i>  | CNT-150 | Fiji              | B (HQ642900)                                         | 24                        | Yes             | No                | 2517434008    |
| 25                | <i>S. pacifica</i>  | CNT-851 | Hawaii            | D (NA)                                               | 14                        | Yes             | No                | 2517572162    |



|    |                    |         |               |               |    |     |     |            |
|----|--------------------|---------|---------------|---------------|----|-----|-----|------------|
| 26 | <i>S. pacifica</i> | CNT-855 | Hawaii        | A (NA)        | 14 | Yes | No  | 2515154128 |
| 27 | <i>S. pacifica</i> | CNY-202 | Sea of Cortez | K (HQ873948)  | 21 | Yes | Yes | 2528311034 |
| 28 | <i>S. pacifica</i> | CNY-330 | Sea of Cortez | ST (NA)       | 19 | Yes | No  | 2518645626 |
| 29 | <i>S. pacifica</i> | CNY-368 | Sea of Cortez | C (HQ873947)  | 19 | No  | NA  | NA         |
| 30 | <i>S. tropica</i>  | CNB-440 | Bahamas       | ST (AY040617) | 11 | Yes | No  | 640427140  |
| 31 | <i>S. tropica</i>  | CNB-536 | Bahamas       | ST (AY040618) | 9  | Yes | No  | 2517572212 |
| 32 | <i>S. tropica</i>  | CNS-197 | Bahamas       | ST (JN999709) | 15 | Yes | No  | 2515154163 |
| 33 | <i>S. tropica</i>  | CNY-012 | Bahamas       | ST (NA)       | 16 | Yes | Yes | 2540341192 |
| 34 | <i>S. tropica</i>  | CNY-678 | Yucatan       | ST (NA)       | 24 | Yes | Yes | 2561511109 |
| 35 | <i>S. tropica</i>  | CNY-681 | Yucatan       | ST (NA)       | 14 | Yes | Yes | 2561511108 |

a) Sequence types defined as per Freel et al., 2012.

**Table S2, Related to Figure 5.** The retimycin gene cluster (NRPS40) from *S. arenicola* CNT-005. Genes are listed as presented from left to right in Figure 5D for NRPS40.

| Gene        | Size (aa) | Annotation                                         | Closest homolog [source] (% similarity/identity)                                                                                | Predicted function         |
|-------------|-----------|----------------------------------------------------|---------------------------------------------------------------------------------------------------------------------------------|----------------------------|
| <i>rtmA</i> | 488       | Amino acid adenylation domain                      | ribosomal peptide synthetase [ <i>Streptomyces davawensis</i> ] (61/49)                                                         | Unknown                    |
| <i>rtmB</i> | 236       | Tryptophan 2,3-dioxygenase                         | tryptophan 2,3-dioxygenase [uncultured bacterium esnapd9] (90/83)                                                               | HQA biosynthesis           |
| <i>rtmC</i> | 421       | Aspartate/tyrosine/aromatic aminotransferase       | kynurenine aminotransferase [ <i>Micromonospora</i> sp. ML1] (83/76)                                                            | HQA biosynthesis           |
| <i>rtmD</i> | 240       | Dehydrogenase                                      | NAD or NADP oxidoreductase [ <i>Micromonospora</i> sp. ML1] (83/75)                                                             | HQA biosynthesis           |
| <i>rtmE</i> | 423       | Cytochrome P450                                    | quinaldate 3-hydroxylase [ <i>Micromonospora</i> sp. ML1] (85/77)                                                               | HQA biosynthesis           |
| <i>rtmF</i> | 528       | (2,3-dihydroxybenzoyl) adenylation synthase        | putative 3-hydroxy-quinaldate-AMP-Ligase [ <i>Micromonospora</i> sp. ML1] (89/76)                                               | HQA biosynthesis           |
| <i>rtmG</i> | 599       | Amino acid adenylation domain                      | NRPS protein [ <i>Micromonospora</i> sp. ML1] (78/70)                                                                           | HQA biosynthesis           |
| <i>rtmH</i> | 391       | Cytochrome P450                                    | cytochrome P450 [ <i>Saccharopolyspora spinosa</i> ] (80/68)                                                                    | Core oxygenation           |
| <i>rtmI</i> | 385       | Kynurenine aminotransferase                        | putative aminotransferase [ <i>Streptomyces</i> sp. SNA15896] (83/77)                                                           | NCA biosynthesis           |
| <i>rtmJ</i> | 634       | Fe-S oxidoreductase                                | hypothetical protein [ <i>Streptomyces</i> sp. SNA15896] (88/81)                                                                | NCA biosynthesis           |
| <i>rtmK</i> | 237       | Methyltransferase                                  | putative SAM-dependent methyltransferase [ <i>Streptomyces</i> sp. SNA15896] (78/64)                                            | Methylation                |
| <i>rtmL</i> | 661       | Fe-S oxidoreductase                                | radical SAM protein [ <i>Saccharomonospora</i> sp. CNQ490] (79/66)                                                              | Thioacetal formation       |
| <i>rtmM</i> | 244       | Thioesterase                                       | putative thioesterase [ <i>Streptomyces</i> sp. SNA15896] (83/74)                                                               | HQA biosynthesis           |
| <i>rtmN</i> | 820       | Excinuclease ATPase subunit                        | UvrA-like protein [ <i>Streptomyces</i> sp. SNA15896] (89/80)                                                                   | Unknown                    |
| <i>rtmO</i> | 2565      | Non-ribosomal peptide synthetase                   | long-chain-fatty-acid--CoA ligase [uncultured bacterium esnapd9] (77/67)                                                        | Peptide backbone formation |
| <i>rtmP</i> | 3126      | Non-ribosomal peptide synthetase                   | putative non-ribosomal peptide synthetase [ <i>Streptomyces</i> sp. SNA15896] (85/77)                                           | Peptide backbone formation |
| <i>rtmQ</i> | 70        | MbtH-like protein                                  | MbtH-like protein [ <i>Streptomyces</i> sp. SNA15896] (85/77)                                                                   | Peptide backbone formation |
| <i>rtmR</i> | 167       | Signal transduction response regulator, C-terminal | MbtH-like protein [ <i>Streptomyces</i> sp. SNA15896] (90/71)<br>OmpR family regulator [ <i>Micromonospora</i> sp. ML1] (85/74) | Unknown                    |

**Table S3, related to Figure 5.**  $^1\text{H}$  and  $^{13}\text{C}$ -NMR spectroscopic data of retimycin A<sup>a</sup> ( $[\alpha] - 12.2^\circ$  (c.0.2,  $\text{CHCl}_3$ ))

| no.   | $\delta_{\text{H}}^b$     | $\delta_{\text{C}}^c$ | no.   | $\delta_{\text{H}}^b$ | $\delta_{\text{C}}^c$ |
|-------|---------------------------|-----------------------|-------|-----------------------|-----------------------|
| 1     |                           | 169.4                 | 33-NH | 9.00 (1H, d, 7.5)     |                       |
| 2     |                           | 47.4                  | 34    |                       | 167.8                 |
| 4     |                           | 169.3                 | 35    | 1.48 (3H, d, 6.5)     | 17.1                  |
| 5     | 6.64 (1H, d, 6.9)         | 60.5                  | 36    | 1.80 (1H, m)          | 26.6                  |
| 5a    | 4.66 (1H, d, 6.9)         | 61.4                  |       | 1.18 (1H, m)          |                       |
| 5c    | 2.95 (3H, s)              | 39.9                  | 37    | 1.64 (1H, m)          | 24.0                  |
| 7     |                           | 173.6                 | 38    | 1.04 (3H, d, 6.2)     | 11.3                  |
| 8     | 4.67 (1H, m)              | 48.3                  | 39    | 3.32 (3H, s)          | 36.2                  |
| 9-NH  | 6.53 (1H, br s)           |                       | 40    | 2.82 (3H, s)          | 29.5                  |
| 10    |                           | 167.1                 | 41    | 1.33 (1H, d, 6.8)     | 18.2                  |
| 11    | 4.72 (1H, m)              | 55.7                  | 42-NH | 8.82 (1H, d, 7.5)     |                       |
| 12    | 5.51 (1H, m)              | 71.5                  | 43    |                       | 167.5                 |
| 14    |                           | 169.5                 | 44    | 1.43 (1H, d, 6.5)     | 16.7                  |
| 15    |                           | 47.1                  | 2'    |                       | 133.6                 |
| 17    |                           | 171.5                 | 3'    |                       | 153.9                 |
| 18    | 7.03 (1H, dd, 10.2, 3.9)  | 54.2                  | 4'    | 7.66 (1H, s)          | 121.1                 |
| 18a   | 3.35 (1H, dd, 15.3, 3.9)  | 26.9                  | 4a'   |                       | 132.4                 |
|       | 2.72 (1H, dd, 15.3, 10.2) |                       | 5'    | 7.71 (1H, m)          | 126.9                 |
| 20    |                           | 173.5                 | 6'    | 7.50 (1H, m)          | 129.0                 |
| 21    | 4.97 (1H, m)              | 45.2                  | 7'    | 7.55 (1H, m)          | 127.6                 |
| 22-NH | 6.92 (1H, d, 7.4)         |                       | 8'    | 7.84 (1H, m)          | 128.9                 |
| 23    |                           | 166.3                 | 8a'   |                       | 140.8                 |
| 24    | 4.71 (1H, m)              | 56.7                  | 2''   |                       | 133.6                 |
| 25    | 5.44 (1H, m)              | 71.5                  | 3''   |                       | 153.9                 |
| 27    | 1.92 (1H, m)              | 25.9                  | 4''   | 7.71 (1H, m)          | 121.4                 |
|       | 1.18 (1H, m)              |                       | 4a''  |                       | 132.4                 |
| 28    | 1.90 (1H, m)              | 24.7                  | 5''   | 7.75 (1H, m)          | 127.0                 |
| 29    | 1.30 (3H, d, 6.2)         | 11.9                  | 6''   | 7.51 (1H, m)          | 129.2                 |
| 30    | 3.41 (3H, s)              | 35.2                  | 7''   | 7.57 (1H, m)          | 127.9                 |
| 31    | 2.80 (3H, s)              | 33.3                  | 8''   | 7.85 (1H, m)          | 129.1                 |
| 32    | 1.56 (3H, d, 6.9)         | 16.7                  | 8a''  |                       | 141.0                 |

<sup>a</sup> NMR data obtained in  $\text{CDCl}_3$ . Assignments are based on  $^1\text{H}$ - $^1\text{H}$  COSY, HSQC, and HMBC spectroscopic data. The assignments for the two 3-hydroxyquinaldic acid rings are interchangeable due to the absence of HMBC correlations from 33-NH and 42-NH protons <sup>b</sup> Measured at 600 MHz for  $^1\text{H}$  NMR;  $\delta$  in ppm, (mult.  $J$  in Hz). <sup>c</sup> Deduced from HSQC and HMBC spectroscopic data;  $\delta$  in ppm.
